10 Running title: Mistranslation impairs development

11 Key words: tRNA, mistranslation, *Drosophila melanogaster*, development, locomotion,

12 proteostasis, deformity, sex-specific

13 Corresponding author: Joshua Isaacson, 1151 Richmond Street, Biological and Geological

14 Sciences Building Room 2082, London, Ontario, N6A 5B7, Canada, email: [jisaacso@uwo.ca](mailto:jisaacso@uwo.ca)

15 phone: 519-661-2111 x85596

## 16 **ABSTRACT**

17           Transfer RNAs (tRNAs) are the adaptor molecules required for reading of the genetic  
18 code and the accurate production of proteins. tRNA variants can lead to genome-wide  
19 mistranslation, the misincorporation of amino acids not specified by the standard genetic code  
20 into nascent proteins. While genome sequencing has identified putative mistranslating tRNA  
21 variants in human populations, little is known regarding how mistranslation affects multicellular  
22 organisms. Here, we create a *Drosophila melanogaster* model for mistranslation by integrating a  
23 serine tRNA variant that mistranslates serine for proline (tRNA<sup>Ser</sup><sub>UGG, G26A</sub>) into the fly genome.  
24 Using mass spectrometry, we find that tRNA<sup>Ser</sup><sub>UGG, G26A</sub> misincorporates serine for proline at a  
25 frequency of ~ 0.6% per codon. We find that mistranslation extends development time and  
26 decreases the number of flies that reach adulthood. Adult flies containing tRNA<sup>Ser</sup><sub>UGG, G26A</sub>  
27 present with more morphological deformities and worse climbing performance than flies  
28 expressing only wild type tRNA. Female flies with the serine tRNA variant have more  
29 deformities and experience a faster decline in climbing performance than males, suggesting sex-  
30 specific effects. This model will enable studies into the synergistic effects of mistranslating  
31 tRNA variants and disease-causing alleles.

## 32 **INTRODUCTION**

33           Mistranslation occurs when an amino acid that differs from what is specified by the  
34 standard genetic code is incorporated into nascent proteins. Mistranslation disrupts proteostasis  
35 and impairs cell function and growth (Nangle *et al.* 2006; Paredes *et al.* 2012; Reverendo *et al.*  
36 2014; Liu *et al.* 2014; Shcherbakov *et al.* 2019), yet naturally occurs in all cells at rates of 10<sup>-2</sup> to  
37 10<sup>-5</sup> per codon, depending on the codon (reviewed in Joshi *et al.* 2019). Protein quality control  
38 pathways allow cells to tolerate mistranslation at frequencies approaching 10% in

39 *Saccharomyces cerevisiae* and *Escherichia coli* (Ruan *et al.* 2008; Berg *et al.* 2019b).  
40 Mistranslating tRNA variants are also tolerated because of the buffering provided by multiple  
41 copies of the genes encoding tRNAs in most organisms (e.g. 610 total tRNA genes in humans  
42 and 295 total tRNA genes in *Drosophila melanogaster*, Chan and Lowe 2016). Mistranslation  
43 can be an adaptive response. For example, high levels of mistranslation increase survival of *E.*  
44 *coli* exposed to DNA damage (Samhita *et al.* 2020) and misincorporation of methionine protects  
45 mammalian, yeast, and bacterial cells against reactive oxygen species (Netzer *et al.* 2009;  
46 Wilttrout *et al.* 2012).

47 Mutations within tRNA encoding genes that alter specificity of aminoacylation or codon  
48 recognition increase mistranslation frequency. The fidelity of aminoacylation depends on  
49 aminoacyl-tRNA synthetases (aaRSs) correctly recognizing their cognate tRNAs through  
50 nucleotides, base pairs, and structural elements within the tRNA called identity elements. The  
51 anticodon is the main identity element for all tRNAs except tRNA<sup>Ser</sup>, tRNA<sup>Ala</sup> and tRNA<sup>Leu</sup>  
52 (Mcclain and Foss 1988; Hou and Schimmel 1988; Normanly *et al.* 1992; Asahara *et al.* 1993;  
53 Achsel and Gross 1993; Breitschopf *et al.* 1995; Himeno *et al.* 1997; Giegé *et al.* 1998).  
54 Changing the anticodon of tRNA<sup>Ser</sup> does not affect aminoacylation but changes codon  
55 recognition (Garza *et al.* 1990; Geslain *et al.* 2010; Reverendo *et al.* 2014; Zimmerman *et al.*  
56 2018; Berg *et al.* 2019b).

57 Mutations in tRNAs that cause mistranslation arise spontaneously and were identified  
58 initially in *E. coli* as suppressors of nonsense and missense mutations (see for examples; Stadler  
59 and Yanofsky 1959; Gorini and Beckwith 1966; Goodman *et al.* 1968). Subsequently,  
60 mistranslating tRNAs have been identified through their suppression of deleterious phenotypes  
61 in fungi, nematodes, plants, and mammalian cells (e.g Goodman *et al.* 1977; Wills *et al.* 1983;

62 Chiu and Morris 1997; El Meziane *et al.* 1998; Murakami *et al.* 2005). While no spontaneous  
63 tRNA variants have been detected through suppression screens in *Drosophila*, Laski *et al.* (1989)  
64 and Garza *et al.* (1990) have engineered amber suppressing tRNA<sup>Tyr</sup> and tRNA<sup>Leu</sup> variants,  
65 respectively, that show a low level of amber stop codon suppression activity when integrated into  
66 the *Drosophila melanogaster* genome. In both cases sterility was noted.

67 In humans, mistranslation due to tRNA variants can cause disease (Goto *et al.* 1990;  
68 Shoffner *et al.* 1990; Zheng *et al.* 2012; Ishimura *et al.* 2014; Schoenmakers *et al.* 2016;  
69 reviewed in Kapur and Ackerman 2018 and Lant *et al.* 2019). Yet tRNA variants are relatively  
70 common in humans, with ~66 tRNA variants per individual, some of which are predicted to  
71 decrease translational fidelity (Berg *et al.* 2019a). Despite the prevalence of potential  
72 mistranslating tRNAs and the potential links between mistranslation and disease, the impact of  
73 mistranslating cytoplasmic tRNAs in multicellular organisms is not well described. In this study,  
74 we develop a transgenic model of mistranslation in *D. melanogaster* by genomically integrating  
75 a serine tRNA variant that mistranslates serine at proline codons. We hypothesize that loss of  
76 proteostasis caused by the mistranslating tRNA will impact development, fitness, and behaviour.  
77 Serine for proline substitutions were detected by mass spectrometry in pupae expressing the  
78 mistranslating tRNA variant. Development time of flies containing the mistranslating tRNA was  
79 extended and fewer flies reached adulthood compared to wild type flies. The tRNA variant  
80 increased the prevalence of morphological deformities in adult flies, with females being more  
81 severely affected than males. Mistranslation also impaired climbing performance. These results  
82 demonstrate that *D. melanogaster* provides a model for the impact and genetic interactions of  
83 mistranslating tRNAs in a multicellular organism and their sexually dimorphic effects.

## 84 **METHODS**

### 85 *Fly husbandry and stocks*

86 All fly stocks were obtained from the Bloomington *Drosophila* Stock Centre and  
87 maintained on standard Bloomington recipe food medium (BDSC; Bloomington, Indiana) under  
88 a 14:10 light:dark cycle at 24°C and 70% relative humidity.

### 89 *Creating transgenic stocks*

90 The gene encoding wild type tRNA<sup>Ser</sup><sub>UGA</sub> (FlyBase ID: FBgn0050201) was amplified  
91 from *D. melanogaster* genomic DNA using primers VK3400/VK3401 (primers are listed in  
92 Table S1) and cloned into pCDF4, which was a kind gift from Dr. Simon Bullock (Port *et al.*  
93 2014) as a *Bgl*III/*Xba*I fragment to create pCB4222. The gene encoding a variant tRNA with a  
94 proline UGG anticodon and G26A secondary mutation (tRNA<sup>Ser</sup><sub>UGG, G26A</sub>) were made by two  
95 step mutagenic PCR with primers VK3400/VK3889 and VK3401/VK3890 in the first round and  
96 pCB4222 as a template. Products from the first round were amplified with outside primers  
97 VK3400/VK3401 and cloned as a *Bgl*III/*Xba*I fragment into pCDF4 to give pCB4250. Full  
98 sequences of wild type tRNA<sup>Ser</sup><sub>UGA</sub> and tRNA<sup>Ser</sup><sub>UGG, G26A</sub> can be found in Figure S1.

99 To create flies containing mistranslating tRNAs, a stock expressing phiC31 (ΦC31)  
100 integrase in the germ line and containing an *attP* site in the left arm of the second chromosome  
101 was used (stock # 25709:  $y^1 v^1 P\{nos-phiC31\int.NLS\}X; P\{CaryP\}attP40$ ). Plasmids were  
102 injected into *D. melanogaster* embryos using the protocol described in Isaacson (2018).  
103 Transgenic flies were identified by their wild type eye colour and balanced using stock # 3703  
104 ( $w^{1118}/Dp(1;Y)y^+$ ;  $CyO/nub^1 b^1 sna Sco lt^1 stw^3$ ;  $MKRS/TM6B, Tb^1$ ) and #76359 ( $w^{1118}$ ;  $wg^{Sp-}$   
105  $^1/CyO, P\{w^{+mC}=2xTb^1-RFP\}CyO; MKRS/TM6B, Tb^1$ ) to create final stocks of the following

106 genotype:  $w^{1118}$ ;  $P\{CaryP\}attP40[v^+=tRNA]/CyO$ ,  $P\{w^+mC=2xTb^1-RFP\}CyO$ ;  $MKRS/TM6B$ ,  
107  $Tb^1$ . After producing offspring, DNA was extracted from both parents of the final cross and PCR  
108 amplified using the primer set M13R and VK3400. PCR products were sequenced to confirm  
109 tRNA identity.

#### 110 *Complementation in Saccharomyces cerevisiae*

111 The *BglIII/XbaI* fragment of pCB422 encoding *Drosophila* tRNA<sup>Ser</sup><sub>UGG, G26A</sub> was cloned  
112 into the *BamHI/XbaI* sites of the yeast-*E. coli* shuttle plasmid YEPlac181 (Gietz and Sugino  
113 1988; *LEU2*, 2 micron; CB4877). CB4877 and YEPlac181 were transformed into the yeast strain  
114 CY9013 (*MATa his3Δ1 leu2Δ0 lys2Δ0 met15Δ0 ura3Δ0 tti2Δ-met5Δ-mTn10luk* containing  
115 pRS313 (Sikorski and Hieter 1989) expressing *tti2-L187P* (Berg *et al.* 2017) selecting for growth  
116 on minimal plates lacking leucine and histidine. Transformants were streaked onto yeast-peptone  
117 (YP) plates containing 2% glucose and 5% ethanol and grown at 30°C for 4 days.

#### 118 *Mass spectrometry*

119 Six replicates of twenty pupae were collected from each genotype and lysed in 8 M urea,  
120 50 mM Tris, 75 mM NaCl, pH 8.2 by grinding with a pestle and with glass beads at 4°C. Protein  
121 was reduced with 5 mM dithiothreitol for 30 minutes at 55°C and alkylated with 15 mM  
122 iodoacetamine for 30 minutes at room temperature. Robotic purification and digestion of  
123 proteins into peptides were performed on the KingFisher<sup>TM</sup> Flex using LysC and the R2-P1  
124 method as described in Leutert *et al.* (2019). Peptides were separated by reverse-phase  
125 chromatography and online analyzed on a hybrid quadrupole orbitrap mass spectrometer  
126 (Orbitrap Exploris 480; Thermo Fisher Scientific) operated in data-dependent acquisition mode  
127 as described in Berg *et al.* (2021).

128 MS/MS spectra were searched against the *D. melanogaster* protein sequence database  
129 (downloaded from Uniprot in 2016) using Comet (release 2015.01; Eng *et al.* 2013). The  
130 precursor mass tolerance was set to 50 ppm. Constant modification of cysteine  
131 carbamidomethylation (57.0215 Da) and variable modification of methionine oxidation (15.9949  
132 Da) and proline to serine (-10.0207 Da) were used for all searches. A maximum of two of each  
133 variable modification were allowed per peptide. Search results were filtered to a 1% false  
134 discovery rate at the peptide spectrum match level using Percolator (Käll *et al.* 2007). The  
135 mistranslation frequency was calculated using the unique mistranslated peptides for which the  
136 non-mistranslated sibling peptide was also observed. The frequency is defined as the counts of  
137 mistranslated peptides, where serine was inserted for proline, divided by the counts of all  
138 peptides containing proline, respectively, and expressed as a percentage.

### 139 *Scoring for deformities*

140 Virgin, heterozygous flies were collected within ~8 hours of eclosion and scored for  
141 deformities in adult legs (limbs gnarled or missing segments), wings (blistered, absent, fluid-  
142 filled, or abnormal size), or abdomen (fused or incomplete tergites). Flies collected before wing  
143 expansion were excluded. Sex and type of deformity was recorded. Flies that had multiple  
144 deformities had each recorded. 433 tRNA<sup>Ser</sup><sub>UGA</sub> flies (227 males and 216 females) and 656  
145 tRNA<sup>Ser</sup><sub>UGG, G26A</sub> flies (345 male and 311 female) were scored. All deformities were  
146 photographed through the lens of a stereomicroscope using a Samsung Galaxy S8 camera.

### 147 *Developmental assays*

148 Approximately 250 flies of each genotype were placed into fly cages and allowed to lay  
149 eggs for one hour. Three replicates of 30 eggs from each plate were collected and checked every



150 12 hours to record progress through each of the following developmental stages: egg hatching  
151 into larva, larva pupating into pupa, and adult eclosing from pupa. Sex, zygosity, and deformities  
152 (as described above) were recorded.

### 153 *Climbing assays*

154 Virgin adult flies were collected, sorted by sex, and scored for deformities. Deformed  
155 flies or flies homozygous for the transgenic tRNA were discarded. Equal numbers of flies were  
156 collected from each genotype during each collection period. Sixty flies in 11 vials from each  
157 genotype were collected and transferred to new food the day before testing. The number of flies  
158 that climbed to a 5cm line in 10 seconds was recorded, and flies were retested every three days  
159 until the flies were 51 days old. Each vial was tested three times.

### 160 *Statistical analyses*

161 All statistical analyses were performed using R Studio 1.2.5001. Frequency of proline-to-  
162 serine misincorporation between tRNA<sup>Ser</sup><sub>UGA</sub> and tRNA<sup>Ser</sup><sub>UGG, G26A</sub> was compared using a *t*-test.  
163 Developmental time data were compared using Wilcoxon rank-sum tests. Fisher's exact tests  
164 were used to compare survival between developmental stages and proportion of deformities. Chi-  
165 square tests were used to compare prevalence of each type of deformity using a post hoc analysis  
166 outlined in Shan and Gerstenberger (2017). A generalized linear model was constructed from the  
167 climbing assay data and performance was compared using F-tests.

## 168 **RESULTS**

169 *A tRNA<sup>Ser</sup> variant induces mistranslation in Drosophila melanogaster*

170 To characterize mistranslation in a multicellular organism, we integrated genes encoding  
171 wild type tRNA<sup>Ser</sup><sub>UGA</sub> as a control and a tRNA<sup>Ser</sup> variant that mistranslates serine for proline  
172 (Figure 1A) into the left arm of the second chromosome of the *D. melanogaster* genome. The  
173 tRNA<sup>Ser</sup> variant has a proline UGG anticodon and G26A secondary mutation (tRNA<sup>Ser</sup><sub>UGG, G26A</sub>).  
174 The alleles were balanced over a homolog that has serial inversions, preventing recombinant  
175 offspring and transgene loss. tRNA insertions were validated with PCR using primers specific to  
176 the inserted plasmid and confirmed by sequencing. The secondary G26A mutation was included  
177 in the mistranslating tRNA to dampen tRNA function as we have previously found a tRNA<sup>Ser</sup>  
178 variant with a proline anticodon causes lethal levels of mistranslation when expressed in yeast  
179 (Berg *et al.* 2017).

180 Adults homozygous for tRNA<sup>Ser</sup><sub>UGA</sub> or tRNA<sup>Ser</sup><sub>UGG, G26A</sub> can be produced. However, we  
181 were unable to propagate the strain homozygous for tRNA<sup>Ser</sup><sub>UGG, G26A</sub> because crosses between  
182 male and female tRNA<sup>Ser</sup><sub>UGG, G26A</sub> homozygotes produce no viable offspring. As such, we used  
183 heterozygous flies for our experiments with adults. Studying heterozygous flies may be more  
184 biologically relevant as mistranslating tRNAs present in populations are likely to arise as single  
185 alleles. We determined zygosity by balancing the tRNAs over a *CyO* homolog containing Tubby-  
186 linked RFP and *miniwhite* (Pina and Pignoni 2012). Heterozygous larvae and pupae are  
187 identified by the presence of RFP and heterozygous adults by their curly wings and non-white  
188 eyes.

189 As an initial test of mistranslation by *Drosophila* tRNA<sup>Ser</sup><sub>UGG, G26A</sub>, we determined if it  
190 would rescue the growth of a *S. cerevisiae* strain containing *tii2-L187* (CY4013). The *tii2-L187*  
191 allele contains a missense mutation converting a CUA codon for leucine to CCA for proline and  
192 results in the slow growth of yeast in stress conditions including in medium containing 5%

193 ethanol (Hoffman *et al.* 2017). Mistranslation of proline to serine rescues the growth of yeast  
194 cells in ethanol medium (Berg *et al.* 2017). The gene encoding *Drosophila* tRNA<sup>Ser</sup><sub>UGG, G26A</sub> was  
195 transformed into yeast strain CY4013 that contains *tti2-L187* as the sole copy of *TTI2*. Cells were  
196 transformed with plasmid expressing *Drosophila* tRNA<sup>Ser</sup><sub>UGG, G26A</sub> or vector alone. As shown in  
197 Figure 1B, *Drosophila* tRNA<sup>Ser</sup><sub>UGG, G26A</sub> enabled growth of CY4013 on medium containing 5%  
198 ethanol indicative of mistranslation by *Drosophila* tRNA<sup>Ser</sup><sub>UGG, G26A</sub>.

199         We then analyzed the proteome of *D. melanogaster* pupae by mass spectrometry to  
200 determine the mistranslation frequency (Figure 1C; Supplemental File S2). Pupae were used  
201 because of the extensive cellular remodelling and corresponding rapid changes in protein  
202 synthesis that occur during this stage (Mitchell *et al.* 1977; Mitchell and Petersen 1981), and the  
203 potential of mistranslation during this stage to influence adult traits such as anatomy or neuronal  
204 function. The frequency of proline to serine mistranslation calculated as the ratio of peptides  
205 containing the mistranslated serine residue to peptides containing the cognate proline residue was  
206 ~0.6% in flies expressing tRNA<sup>Ser</sup><sub>UGG, G26A</sub>. In the control strain, the frequency of proline to  
207 serine substitutions was 0.1%.

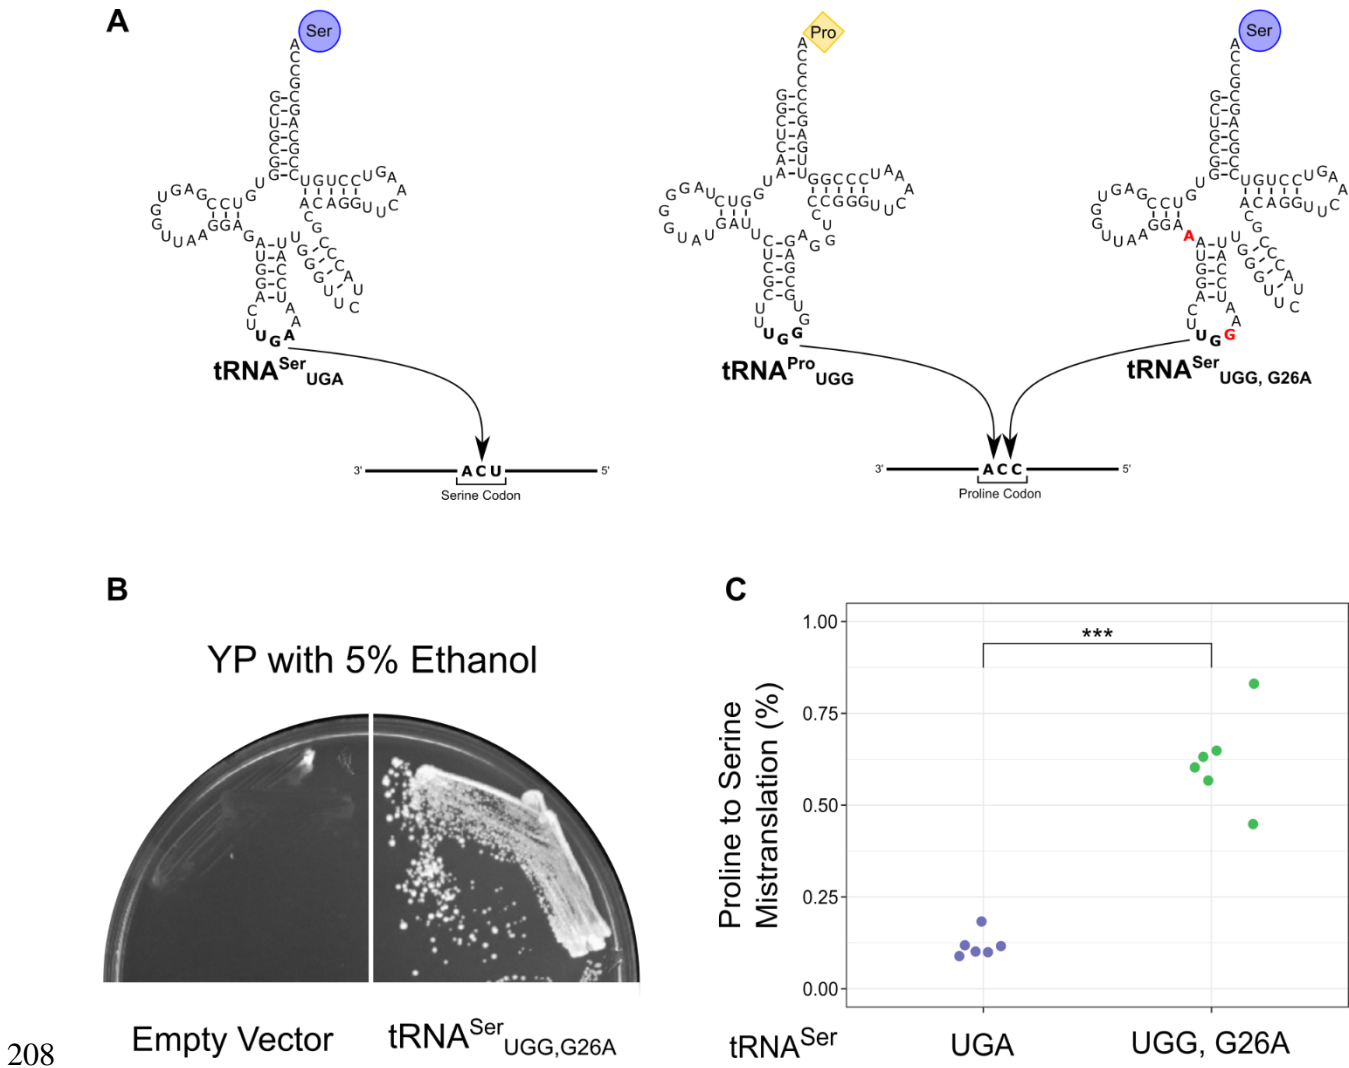

208  
 209 **Figure 1.** *tRNA<sup>Ser</sup><sub>UGG, G26A</sub>* induces mistranslation in *D. melanogaster*. **A)** Wild type serine  
 210 tRNAs base pair with serine codons during translation and incorporate serine into the growing  
 211 polypeptide. Serine tRNA variants with anticodon mutations can recognize non-serine codons  
 212 and misincorporate serine during translation. *tRNA<sup>Ser</sup><sub>UGG, G26A</sub>* competes with *tRNA<sup>Pro</sup><sub>UGG</sub>* for  
 213 CCA codons and inserts serine at proline codons. Red bases indicate mutation compared to the  
 214 wild type *tRNA<sup>Ser</sup><sub>UGA</sub>*. **B)** *D. melanogaster* *tRNA<sup>Ser</sup><sub>UGG, G26A</sub>* suppresses the ethanol sensitivity  
 215 caused by *tii2-L187P* in *S. cerevisiae*. Plasmid encoding the vector alone (left) or the gene  
 216 expressing *tRNA<sup>Ser</sup><sub>UGG, G26A</sub>* (right) were transformed into CY9013 (*tii2-L187P*), streaked onto

217 YP medium containing 5% ethanol and grown at 30° for 4 days. C) Frequency of proline-to-  
218 serine mistranslation in tRNA<sup>Ser</sup><sub>UGA</sub> and tRNA<sup>Ser</sup><sub>UGG, G26A</sub> pupae (n = 6 replicates of 20 pupae  
219 each). Genotypes were compared using a *t*-test. “\*\*\*\*” p < 0.001.

220

### 221 *Mistranslation adversely affects D. melanogaster development*

222 To determine if tRNA<sup>Ser</sup><sub>UGG, G26A</sub> affects fly development, we collected 90 one-hour old  
223 embryos and monitored how many individuals survived through each developmental stage and  
224 time between each stage: egg laying to embryos hatching into larvae, hatching to pupation, and  
225 pupation to eclosion of adults. Since the RFP marker used to determine tRNA zygosity is not  
226 expressed at early embryonic stages, both homozygotes and heterozygotes were pooled in this  
227 assay. Flies were checked every twelve hours and sex, zygosity, and presence of deformities in  
228 adults were recorded (Supplemental file S2). No obvious patterns were noted regarding these  
229 traits and because too few adults eclosed in this experiment, statistical comparisons were not  
230 possible.

231 Of the 90 embryos collected, significantly more flies with wild type tRNA<sup>Ser</sup><sub>UGA</sub> reached  
232 larval (41 vs. 27, Fisher’s exact test, p = 0.045), pupal (24 vs. 10, p = 0.013), and adult stages (22  
233 vs. 9, p = 0.017, Figure 2A) than the mistranslating tRNA<sup>Ser</sup><sub>UGG, G26A</sub>. Absolute numbers are  
234 influenced by die-off in the preceding life-cycle stage, so proportions were also calculated to  
235 assess pupal and adult survival. When comparing the proportion of larvae that pupated, 58% of  
236 tRNA<sup>Ser</sup><sub>UGA</sub> and 37% of tRNA<sup>Ser</sup><sub>UGG, G26A</sub> larvae reached pupation, although this difference was  
237 not statistically significant (p = 0.13). The proportion of adults that eclosed from pupae was  
238 virtually identical, 91% for tRNA<sup>Ser</sup><sub>UGA</sub> and 90% for tRNA<sup>Ser</sup><sub>UGG, G26A</sub> (Supp. File S2). These

239 data indicate that flies are particularly susceptible to lethal effects of mistranslation during  
240 embryogenesis but show increased tolerance once they reach pupation. Although there was no  
241 significant difference between proportion of tRNA<sup>Ser</sup><sub>UGA</sub> and tRNA<sup>Ser</sup><sub>UGG, G26A</sub> larvae that  
242 pupated, there was a trend of lower survival in tRNA<sup>Ser</sup><sub>UGG, G26A</sub> such that larvae seem to display  
243 an intermediate sensitivity phenotype between embryos and pupae.

244 Eggs expressing tRNA<sup>Ser</sup><sub>UGG, G26A</sub> had similar hatching times as eggs expressing wild type  
245 tRNA<sup>Ser</sup> ( $p = 0.78$ , Wilcoxon rank-sum test, Figure 2B). However, larvae expressing tRNA<sup>Ser</sup><sub>UGG,</sub>  
246 <sub>G26A</sub> pupated significantly slower than the wild type ( $p = 0.023$ , Figure 2C). This trend continued  
247 into adulthood, as the control adult tRNA<sup>Ser</sup><sub>UGA</sub> flies eclosed significantly sooner than  
248 tRNA<sup>Ser</sup><sub>UGG, G26A</sub> flies ( $p = 0.047$ , Figure 2D). Only 20% of the mistranslating flies pupated by  
249 the median time for flies with the wild-type tRNA, and only 33% eclosed by the wild-type tRNA  
250 median eclosion time.

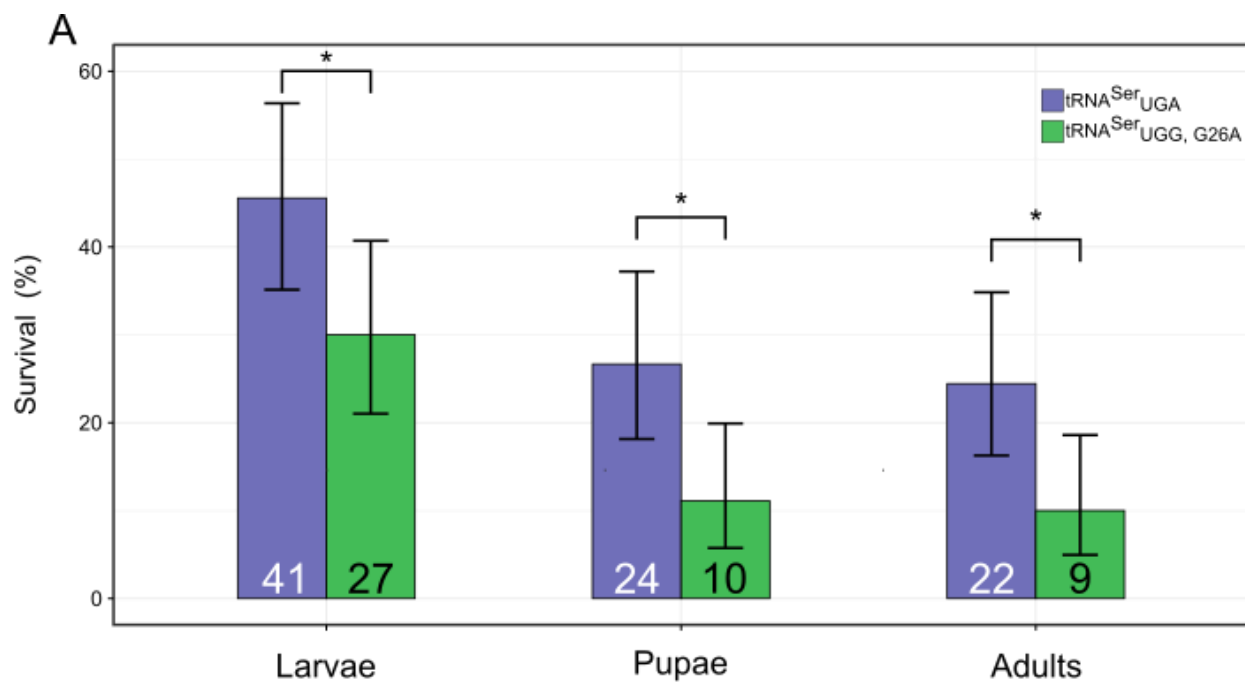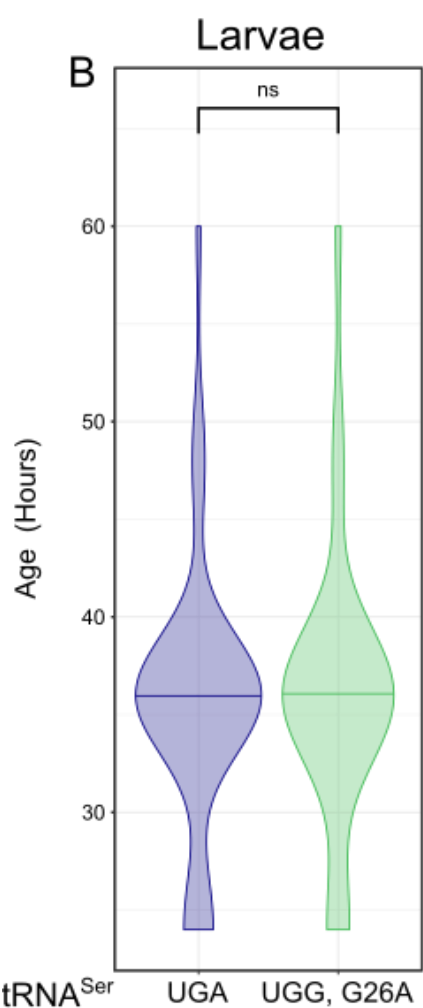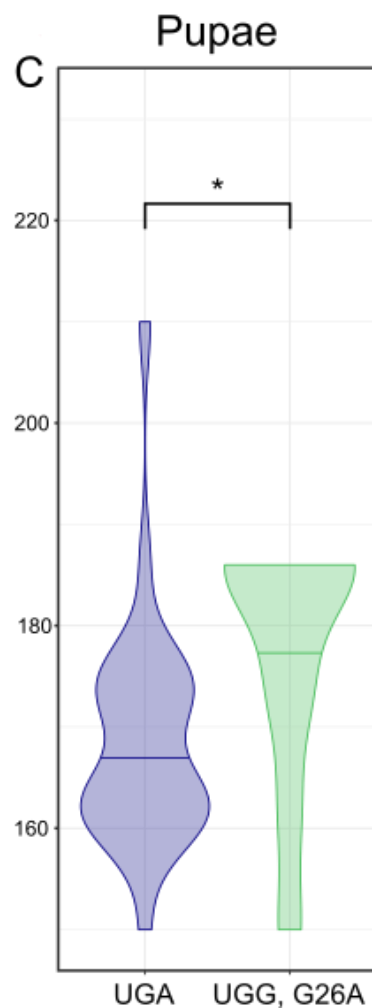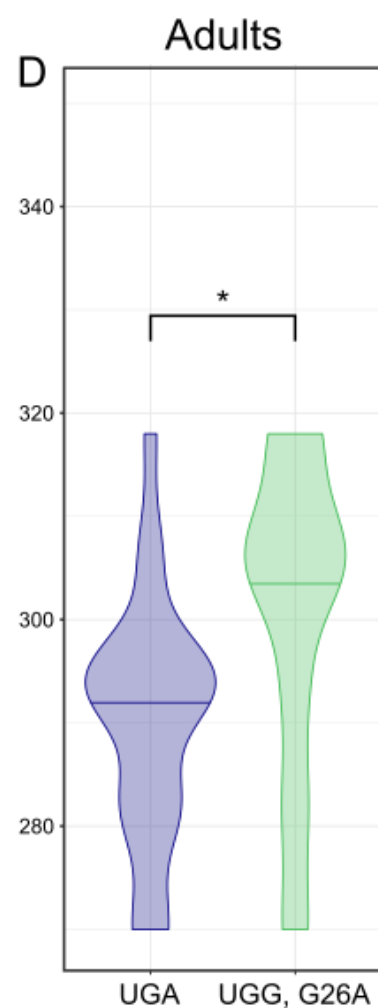

251

252 **Figure 2.** *Mistranslation from a tRNA variant impacts development of D. melanogaster.* **A)**  
253 Percentage of the 90 tRNA<sup>Ser</sup><sub>UGA</sub> and tRNA<sup>Ser</sup><sub>UGG, G26A</sub> containing individuals that made it to  
254 larval, pupal, and adult stages. Survival was compared using Fisher's exact test. Error bars  
255 represent the 95% confidence interval of the proportion. Values within bars represent the number  
256 of flies that reached that developmental stage. **B)** Violin plot depicting the distribution of times  
257 until for tRNA<sup>Ser</sup><sub>UGA</sub> and tRNA<sup>Ser</sup><sub>UGG, G26A</sub> embryos to hatch into larva. The horizontal line within  
258 the plot represents the median of the distribution. Genotypes were compared using Wilcoxon  
259 rank-sum tests. **C)** Total time until pupation. **D)** Total time until eclosion. "ns"  $p \geq 0.05$ , "\*"  $p <$   
260  $0.05$ , "\*\*\*"  $p < 0.01$ , "\*\*\*\*"  $p < 0.001$ .

261  
262 Mutations in genes vital to proteostasis or translation fidelity cause morphological defects  
263 (Rutherford and Lindquist 1998; Cui and DiMario 2007; Reverendo *et al.* 2014). We observed  
264 that flies containing one copy of the exogenous tRNA<sup>Ser</sup><sub>UGG, G26A</sub> had deformities including  
265 gnarled or blistered legs, notched wings, and misfused tergites (Figure 3A-D). Other  
266 abnormalities (e.g. haltere aberrations or rough eyes) were rarely observed, so only the more  
267 common leg, wing, and tergite deformities were scored. To determine if the frequency of  
268 deformities was greater than the control, we calculated the proportion of flies that eclosed with at  
269 least one deformity. These flies were collected separately from the development assay described  
270 above. From a total of 433 tRNA<sup>Ser</sup><sub>UGA</sub> flies (227 males and 216 females) and 656 tRNA<sup>Ser</sup><sub>UGG,</sub>  
271 <sub>G26A</sub> flies (345 male and 311 female) we identified significantly more deformities in flies  
272 containing tRNA<sup>Ser</sup><sub>UGG, G26A</sub> than tRNA<sup>Ser</sup><sub>UGA</sub> (Fisher's exact test corrected using Holm-  
273 Bonferroni's method,  $p < 0.001$ , Figure 3E). In addition, female flies containing tRNA<sup>Ser</sup><sub>UGG, G26A</sub>  
274 had more deformities than males ( $p < 0.001$ , Figure 3F). Interestingly, flies containing



275 tRNA<sup>Ser</sup><sub>UGG, G26A</sub> presented with disproportionately more tergite deformities than flies with the  
276 wild type tRNA<sup>Ser</sup><sub>UGA</sub> (Chi-square test, corrected p = 0.03, Supplemental File S3), indicating that  
277 this mistranslating tRNA<sup>Ser</sup> variant is particularly deleterious to fly abdominal development.  
278 These results suggest that mistranslation disrupts fly development and female flies are more  
279 sensitive to the presence of mistranslating tRNA variants.

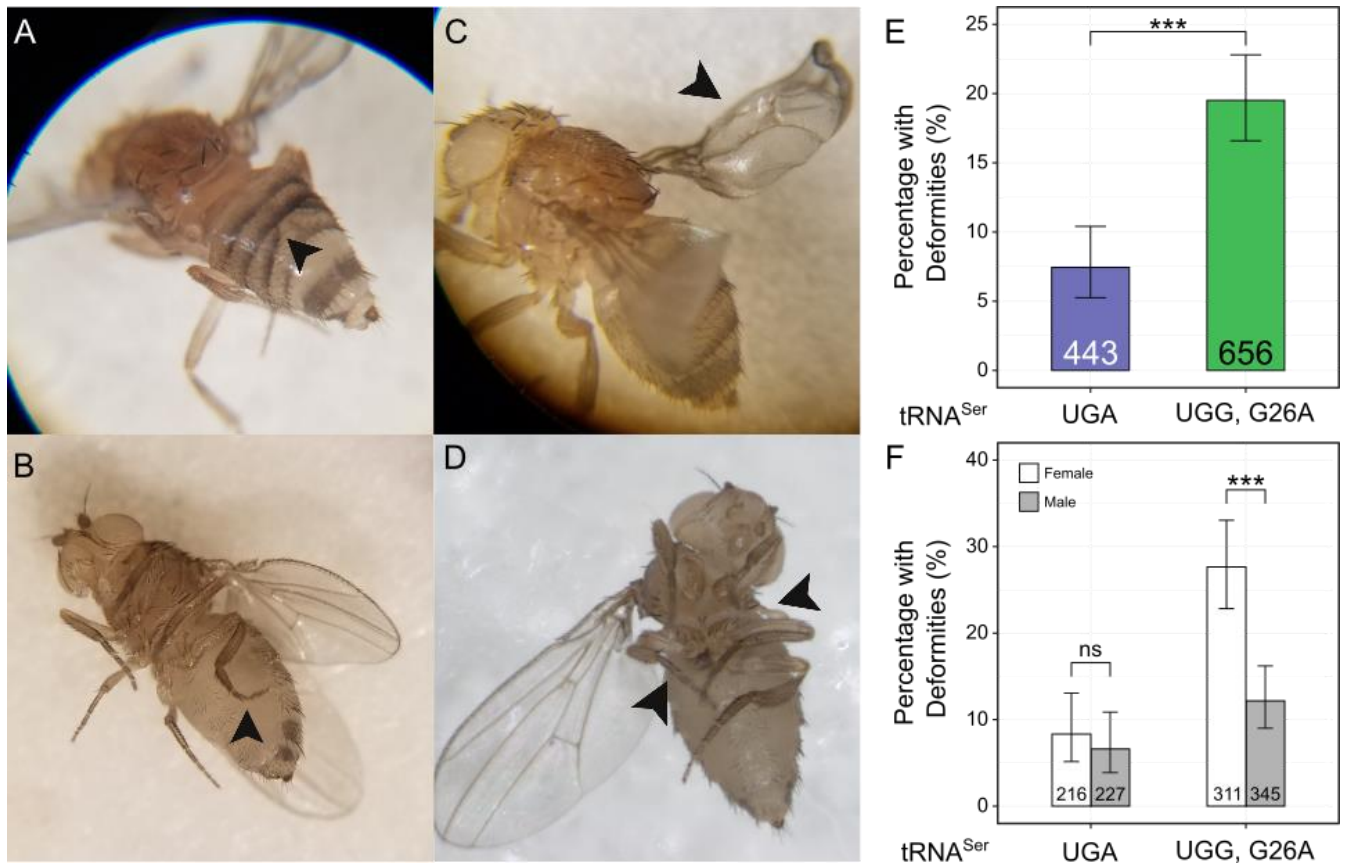

280

281 **Figure 3.** *The tRNA<sup>Ser</sup><sub>UGG, G26A</sub> variant causes morphological deformities in adults in a sex-*  
 282 *specific manner. A) Examples of flies with misfused tergites, B) gnarled hindlegs, C) wing*  
 283 *blisters, and D) missing wings/legs, as indicated by arrowheads. E) Percentage of tRNA<sup>Ser</sup><sub>UGA</sub> or*  
 284 *tRNA<sup>Ser</sup><sub>UGG, G26A</sub> flies that eclosed with at least one deformity. Groups were compared using*  
 285 *Fisher’s exact test and corrected using the Holm-Bonferroni method. Bar height represents the*  
 286 *percentage of flies of a genotype that had at least one deformity. Error bars represent the 95%*  
 287 *confidence interval. Values within bars describe the number of flies examined for deformities. F)*  
 288 *Same data as E but separated by sex. “ns” p ≥ 0.05, “\*” p < 0.05, “\*\*\*” p < 0.01, “\*\*\*\*” p < 0.001.*

289

290

291 *tRNA<sup>Ser</sup><sub>UGG, G26A</sub> impacts fly motility*

292 Negative geotaxis assays are often used to study neurodegenerative diseases (e.g Feany  
293 and Bender 2000; Song *et al.* 2017; Aggarwal *et al.* 2019), so as an initial examination of  
294 neurodegeneration, we determined if tRNA<sup>Ser</sup><sub>UGG, G26A</sub> impaired climbing performance. Sixty  
295 virgin, heterozygous flies of the four genotypes (tRNA<sup>Ser</sup><sub>UGA</sub> males and females, and tRNA<sup>Ser</sup><sub>UGG,</sub>  
296 <sub>G26A</sub> males and females) were collected and tested using a climbing assay every three days; flies  
297 with deformities were not used in this experiment.

298 As expected, climbing performance of all genotypes decreased with age (F-tests  
299 performed on generalized linear models corrected using Bonferroni's method, Supplementary  
300 File S2). For both males and females, climbing performance of tRNA<sup>Ser</sup><sub>UGG, G26A</sub> flies was  
301 significantly worse than wild type tRNA<sup>Ser</sup><sub>UGA</sub> flies (male:  $p = 0.001$ , female:  $p < 0.001$ , Figure  
302 4A, B). Climbing performance was not significantly different when comparing males to females  
303 in either the control tRNA<sup>Ser</sup><sub>UGA</sub> ( $p = 0.08$ ) or mistranslating tRNA<sup>Ser</sup><sub>UGG, G26A</sub> flies (corrected  $p$   
304  $\rightarrow 1$ , Figure 4C, D). The climbing ability of male and female flies containing the wild type  
305 tRNA<sup>Ser</sup><sub>UGA</sub> declined at similar rates, as evidenced by the parallel performance curves ( $p = 0.97$ ,  
306 Figure 4C). However, the climbing performance curve of female flies containing tRNA<sup>Ser</sup><sub>UGG,</sub>  
307 <sub>G26A</sub> intersected the male curve, indicating that female climbing performance declined faster than  
308 in males ( $p = 0.038$ , Figure 4D, Supp. File S3). These data suggest that the mistranslating  
309 tRNA<sup>Ser</sup> variant negatively affects locomotion and has an accelerated impact on female ability to  
310 climb as they age.

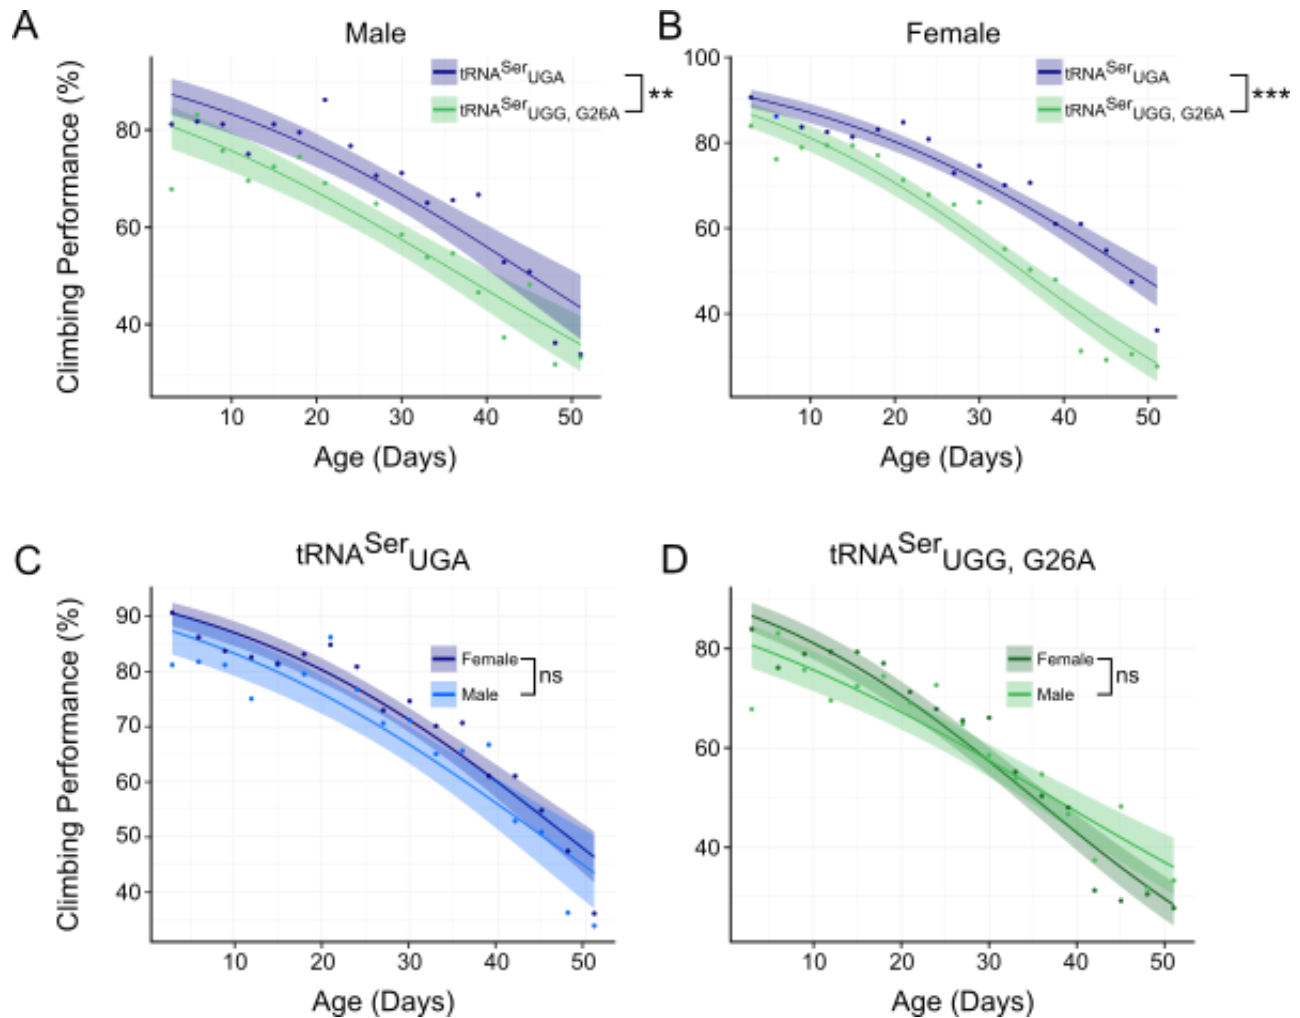

311

312 **Figure 4.** Fly locomotion is impacted by a mistranslating tRNA<sup>Ser</sup> variant. Each point represents  
 313 the percentage of flies (out of 60 from 11 vials) that managed to climb 5cm in ten seconds  
 314 averaged over three trials. Generalized linear models were constructed from the performance  
 315 data and F-tests were performed on the models. P-values were corrected using Bonferroni's  
 316 method. Shaded region represents the 95% confidence intervals for the fitted performance  
 317 curves. **A)** Climbing performance of male flies containing tRNA<sup>Ser</sup><sub>UGA</sub> or tRNA<sup>Ser</sup><sub>UGG, G26A</sub>. **B)**  
 318 Climbing performance of female flies containing tRNA<sup>Ser</sup><sub>UGA</sub> or tRNA<sup>Ser</sup><sub>UGG, G26A</sub>. **C)** Climbing  
 319 performance of male and female flies containing tRNA<sup>Ser</sup><sub>UGA</sub> or **D)** tRNA<sup>Ser</sup><sub>UGG, G26A</sub>. “ns” p ≥  
 320 0.05, “\*” p < 0.05, “\*\*\*” p < 0.01, “\*\*\*\*” p < 0.001.

## 321 **DISCUSSION**

### 322 *Creating a fly model of mistranslation*

323 We have created a *Drosophila melanogaster* model containing a genomically-integrated  
324 cytosolic tRNA that mistranslates serine for proline. The mistranslating fly model expands the  
325 possibilities offered by yeast or cell lines by allowing for studies into sex-specific or tissue-  
326 specific effects of mistranslating tRNA variants and the effect of tRNA variants on development  
327 and disease.

328 Our method of transgene integration controlled for positional effects by inserting either  
329 wild type or mistranslating tRNA<sup>Ser</sup><sub>UGG, G26A</sub> into the same locus on chromosome 2L. The fly  
330 lines containing tRNA<sup>Ser</sup><sub>UGG, G26A</sub> have not lost the transgene for over two years, indicating that  
331 mistranslating tRNA variants can be stably maintained in the genome. We observed a proline-to-  
332 serine misincorporation rate of ~ 0.6% in the pupae for the genomically integrated tRNA<sup>Ser</sup><sub>UGG,</sub>  
333 <sub>G26A</sub> gene. This level of mistranslation was sufficient to cause deleterious phenotypes affecting  
334 diverse aspects of fly physiology.

335 Mistranslation frequency is affected by multiple factors, such as codon usage, expression  
336 of the tRNA, stability and turnover of the tRNA variant, and number of competing tRNA genes.  
337 The distribution of tRNAs that compete with tRNA<sup>Ser</sup><sub>UGG, G26A</sub> in flies as well as the relevant  
338 codon usage is shown in Supplemental File 1. Flies contain two proline tRNA species that  
339 compete with tRNA<sup>Ser</sup><sub>UGG, G26A</sub> for decoding CCA codons (tRNA<sup>Pro</sup><sub>UGG</sub> and tRNA<sup>Pro</sup><sub>AGG</sub> through  
340 modification of A34 to inosine; Crick 1966; Boccaletto *et al.* 2018); likewise mistranslating  
341 tRNA<sup>Ser</sup><sub>UGG, G26A</sub> competes with two proline tRNA species (tRNA<sup>Pro</sup><sub>CGG</sub> and tRNA<sup>Pro</sup><sub>UGG</sub> through  
342 wobble pairing) for decoding CCG codons. The maximum frequency of mistranslation with a  
343 heterozygous tRNA<sup>Ser</sup><sub>UGG, G26A</sub> encoding gene in flies is 2.4% (see Table S2 for calculations).

344 The less than maximal frequency of 0.6% observed for tRNA<sup>Ser</sup><sub>UGG, G26A</sub> is expected because the  
345 G26A mutation prevents dimethylation at position 26, which increases turnover by the rapid  
346 tRNA decay pathway (Dewe *et al.* 2012).

347 *A mistranslating tRNA<sup>Ser</sup> variant has diverse and sex-specific effects on flies*

348 The mistranslating tRNA<sup>Ser</sup><sub>UGG, G26A</sub> affected fly physiology consistent with organism-  
349 wide loss of proteostasis. Our findings resemble other studies of proteostasis loss in flies.  
350 Impaired heat shock response exacerbates neurodegeneration and increases development time  
351 (Warrick *et al.* 1999; Gong and Golic 2006), and many of the wing, leg and tergite deformities  
352 observed for heterozygous *Heat shock protein 83 (Hsp83)* mutants look similar to those observed  
353 in this study (Rutherford and Lindquist 1998). Developmental and neurodegenerative phenotypes  
354 including locomotive defects as measured in a climbing assay were likewise observed in flies  
355 containing a misacylation-prone PheRS (Lu *et al.* 2014). It is interesting to note that reduced  
356 levels of translation lead to similar deformities as found in mistranslating flies. RNAi  
357 knockdown of *Nopp140*, a gene involved in ribosome assembly, causes flies to present with  
358 gnarled legs, missing wings, and misfused tergites (Cui and DiMario 2007). *Minute* genes  
359 describe a collection of >50 genes required for protein synthesis. Their mutation results in  
360 shorter, thinner bristles, delayed development, smaller body size, and anatomical deformities  
361 when mutated (Schultz 1929; Marygold *et al.* 2007), again similar to the developmental and  
362 anatomical aberrations seen in flies containing the mistranslating tRNA<sup>Ser</sup> variant. Though  
363 reduced translation and mistranslation are different processes, the similar phenotypes produced  
364 demonstrate that development is highly dependent on accurate and efficient translation.

365 The increased impact of the mistranslating tRNA on female flies was striking. *D.*  
366 *melanogaster* males and females have highly different physiology and experience different

367 developmental challenges. Adult females are larger than males, develop faster, invest more  
368 resources into reproduction, and tend to live longer than males (Bonnier 1926; Bakker 1959;  
369 Sørensen *et al.* 2007; Ziehm *et al.* 2013). Males and females also display dimorphic responses to  
370 proteotoxic stress. Fredriksson *et al.* (2012) examined protein carbonylation in female somatic  
371 and germ line cells at different ages to determine how aging affects protein quality control of  
372 somatic and reproductive tissues. They found that as females age, there are fewer carbonylated  
373 proteins and reduced protein aggregation (both indicators of proteostasis loss) in eggs compared  
374 to the soma. Their work shows that females prioritize proteostasis of their eggs over their  
375 somatic cells, even while unmated. This trade-off could exacerbate the stress of mistranslating  
376 tRNAs in females, particularly as they experience aging-induced loss of proteostasis, and could  
377 contribute to the faster decline of climbing performance observed in female tRNA<sup>Ser</sup><sub>UGG, G26A</sub>  
378 flies compared to males. Many stress-response pathways affect males and females differently.  
379 For example, induction of the heat shock response increases male lifespan whereas female  
380 lifespan is unaffected (Sørensen *et al.* 2007; reviewed in Tower 2011). Dietary restriction shows  
381 the opposite trend, as it increases female lifespan more than male (Nakagawa *et al.* 2012; Regan  
382 *et al.* 2016; reviewed in Garratt 2020). Experiments testing the effects of mistranslating tRNAs  
383 on male and female fly longevity are ongoing. It is also possible that expression of the  
384 mistranslating tRNA differs between males and females or that the mistranslating tRNA has  
385 alternative functions (e.g. tRNA-derived fragments) that differ between males and females.

### 386 *Implications for human disease*

387 Our work suggests that mistranslating tRNA variants have the potential to influence  
388 multiple aspects of human physiology. From a development perspective, the alteration in  
389 progression through life stages and increased number of deformities suggest that the proteotoxic

390 stress resulting from mistranslating tRNA variants may contribute to congenital or  
391 developmental anomalies. Flies expressing tRNA<sup>Ser</sup><sub>UGG, G26A</sub> have a pattern of locomotion defects  
392 similar to those seen for flies expressing alleles associated with neurodegeneration (Feany and  
393 Bender 2000; Song *et al.* 2017; Aggarwal *et al.* 2019). Interestingly, the mistranslating fly model  
394 further resembles human neuropathies in that climbing performance declined faster in female  
395 compared to male flies, just as some neurodegenerative disorders such as Alzheimer's and  
396 Huntington's Disease, are more common or severe in women compared to men (Viña and Lloret  
397 2010; Zielonka *et al.* 2013).

398         Given the prevalence of putative mistranslating tRNAs in the human population (Berg *et*  
399 *al.* 2019a) and the potential for mistranslation to disrupt proteostasis, we hypothesize that  
400 mistranslating tRNAs can exacerbate diseases characterized by a loss of proteostasis (see also  
401 Reverendo *et al.* 2014), and our results here indicate that these effects may differ in magnitude  
402 between sexes. Our previous studies in yeast have shown negative genetic interactions between  
403 mistranslation and mutations in genes involved in protein quality control and other pathways that  
404 could contribute to disease (Hoffman *et al.* 2017; Berg *et al.* 2020, 2021). Our *D. melanogaster*  
405 model of mistranslation allows for the expansion of these studies into the investigation of mutant  
406 tRNA contribution to disease and development.

#### 407 *Data availability*

408 Fly lines and plasmids are available upon request. The authors affirm that all data necessary for  
409 confirming the conclusions of the article are present within the article, figures, and supplemental  
410 material. Supplemental files are available at FigShare. Supplemental File S1 contains all  
411 supplemental figures and tables. Supplemental File S2 contains all raw data. Supplemental File



412 S3 contains R code used to analyze mass spectrometry, developmental, deformity, and climbing  
413 assay data. Supplemental File S4 contains all images of deformed flies. The mass spectrometry  
414 proteomics data have been deposited to the ProteomeXchange Consortium via the PRIDE partner  
415 repository (Perez-Riverol *et al.* 2019) with the dataset identifier PXD028498.

## 416 **Acknowledgements**

417 We would like to thank the Biotron Integrated Microscopy facility for their aid with this  
418 research. In particular, JRI would like to thank Karen Nygard, Reza Khazaei, and Marc  
419 Courchesne for their instruction and help. We would also like to thank Dr. Yolanda Morbey for  
420 guidance on analyzing the climbing assay data, Ricard Rodriguez-Mias for assisting with the  
421 mass spectrometry and maintaining the instruments, and Julie Genereaux for technical  
422 assistance.

## 423 **Funding**

424 This work was supported by NSERC grants to CJB [RGPIN-2015-04394] and AJM [RGPIN-  
425 2020-06464], as well as a UWO MHSRB seed grant to AJM. Mass spectrometry work was  
426 supported by a research grant from the Keck Foundation, NIH grant R35 GM119536 and  
427 associated instrumentation supplement to JV. JRI and MDB were supported by an NSERC PGS-  
428 D and NSERC CGS-D respectively.

## 429 **Conflicts of Interest**

430 The authors declare that there was no conflict of interest while conducting and reporting this  
431 research.

432

433 **Literature Cited**

- 434 Achsel T., and H. J. Gross, 1993 Identity determinants of human tRNA<sup>Ser</sup>: sequence elements  
435 necessary for serylation and maturation of a tRNA with a long extra arm. *EMBO J.* 12:  
436 3333–3338.
- 437 Aggarwal A., H. Reichert, and K. VijayRaghavan, 2019 A locomotor assay reveals deficits in  
438 heterozygous Parkinson’s disease model and proprioceptive mutants in adult *Drosophila*.  
439 *Proc. Natl. Acad. Sci. USA.* 116: 24830–24839.
- 440 Asahara H., H. Himeno, K. Tamura, T. Hasegawa, K. Watanabe, *et al.*, 1993 Recognition  
441 nucleotides of *Escherichia coli* tRNA<sup>Leu</sup> and its elements facilitating discrimination from  
442 tRNA<sup>Ser</sup> and tRNA<sup>Tyr</sup>. *J. Mol. Biol.* 231: 219–229.
- 443 Bakker K., 1959 Feeding period, growth, and pupation in larvae of *Drosophila melanogaster*.  
444 *Entomol. Exp. Appl.* 2: 171–186.
- 445 Berg M. D., K. S. Hoffman, J. Genereaux, S. Mian, R. S. Trussler, *et al.*, 2017 Evolving  
446 mistranslating tRNAs through a phenotypically ambivalent intermediate in *Saccharomyces*  
447 *cerevisiae*. *Genetics* 206: 1865–1879.
- 448 Berg M. D., D. J. Giguere, J. S. Dron, J. T. Lant, J. Genereaux, *et al.*, 2019a Targeted sequencing  
449 reveals expanded genetic diversity of human transfer RNAs. *RNA Biol.* 16: 1574–1585.
- 450 Berg M. D., Y. Zhu, J. Genereaux, B. Y. Ruiz, R. A. Rodriguez-Mias, *et al.*, 2019b Modulating  
451 mistranslation potential of tRNA<sup>Ser</sup> in *Saccharomyces cerevisiae*. *Genetics* 213: 849–863.
- 452 Berg M. D., Y. Zhu, J. Isaacson, J. Genereaux, R. Loll-Krippleber, *et al.*, 2020 Chemical-genetic  
453 interactions with the proline analog 1-azetidine-2-carboxylic acid in *Saccharomyces*

- 454 *cerevisiae*. G3 Genes|Genomes|Genetics 10: 4335–4345.
- 455 Berg M. D., Y. Zhu, B. Y. Ruiz, R. Loll-Krippelber, J. Isaacson, *et al.*, 2021 The amino acid  
456 substitution affects cellular response to mistranslation. G3 Genes|Genomes|Genetics  
457 jkab218.
- 458 Boccaletto P., M. A. MacHnicka, E. Purta, P. Pitkowski, B. Baginski, *et al.*, 2018 MODOMICS:  
459 a database of RNA modification pathways. 2017 update. Nucleic Acids Res. 46: D303–  
460 D307.
- 461 Bonnier G., 1926 Temperature and time of development of the two sexes in *Drosophila*. J. Exp.  
462 Biol. 4: 186–195.
- 463 Breitschopf K., T. Achsel, K. Busch, and H. J. Gross, 1995 Identity elements of human tRNA<sup>Leu</sup>:  
464 structural requirements for converting human tRNA<sup>Ser</sup> into a leucine acceptor in vitro.  
465 Nucleic Acids Res. 23: 3633–3637.
- 466 Chan P. P., and T. M. Lowe, 2016 GtRNADB 2.0: An expanded database of transfer RNA genes  
467 identified in complete and draft genomes. Nucleic Acids Res. 44: D184–D189.
- 468 Chiu Y. H., and N. R. Morris, 1997 Genetic and molecular analysis of a tRNA<sup>Leu</sup> missense  
469 suppressor of *nudC3*, a mutation that blocks nuclear migration in *Aspergillus nidulans*.  
470 Genetics 145: 707–714.
- 471 Crick F. H. C., 1966 Codon—anticodon pairing: the wobble hypothesis. J. Mol. Biol. 19: 548–  
472 555.
- 473 Cui Z., and P. J. DiMario, 2007 RNAi knockdown of Nopp140 induces *Minute*-like phenotypes  
474 in *Drosophila*. Mol. Biol. Cell 18: 2179–2191.

- 475 Dewe J. M., J. M. Whipple, I. Chernyakov, L. N. Jaramillo, and E. M. Phizicky, 2012 The yeast  
476 rapid tRNA decay pathway competes with elongation factor 1A for substrate tRNAs and  
477 acts on tRNAs lacking one or more of several modifications. *RNA* 18: 1886–1896.
- 478 Eng J. K., T. A. Jahan, and M. R. Hoopmann, 2013 Comet: An open-source MS/MS sequence  
479 database search tool. *Proteomics* 13: 22–24.
- 480 Feany M. B., and W. W. Bender, 2000 A *Drosophila* model of Parkinson’s disease. *Nature* 404:  
481 394–398.
- 482 Fredriksson Å., E. Johansson Krogh, M. Hernebring, E. Pettersson, A. Javadi, *et al.*, 2012 Effects  
483 of aging and reproduction on protein quality control in soma and gametes of *Drosophila*  
484 *melanogaster*. *Aging Cell* 11: 634–643.
- 485 Garratt M., 2020 Why do sexes differ in lifespan extension? Sex-specific pathways of aging and  
486 underlying mechanisms for dimorphic responses. *Nutr. Heal. Aging* 5: 247–259.
- 487 Garza D., M. M. Medhora, and D. L. Hartl, 1990 *Drosophila* nonsense suppressors: functional  
488 analysis in *Saccharomyces cerevisiae*, *Drosophila* tissue culture cells and *Drosophila*  
489 *melanogaster*. *Genetics* 126: 625–37.
- 490 Geslain R., L. Cubells, T. Bori-Sanz, R. Álvarez-Medina, D. Rossell, *et al.*, 2010 Chimeric  
491 tRNAs as tools to induce proteome damage and identify components of stress responses.  
492 *Nucleic Acids Res.* 38: e30.
- 493 Giegé R., M. Sissler, and C. Florentz, 1998 Universal rules and idiosyncratic features in tRNA  
494 identity. *Nucleic Acids Res.* 26: 5017–5035.
- 495 Gietz R. D., and A. Sugino, 1988 New yeast-*Escherichia coli* shuttle vectors constructed with in

- 496        vitro mutagenized yeast genes lacking six-base pair restriction sites. *Gene* 74: 527–534.
- 497    Gong W. J., and K. G. Golic, 2006 Loss of Hsp70 in *Drosophila* is pleiotropic, with effects on  
498        thermotolerance, recovery from heat shock and neurodegeneration. *Genetics* 172: 275–286.
- 499    Goodman H. M., J. Abelson, A. Landy, S. Brenner, and J. D. Smith, 1968 Amber suppression: a  
500        nucleotide change in the anticodon of a tyrosine transfer RNA. *Nature* 217: 1019–1024.
- 501    Goodman H. M., M. V. Olson, and B. D. Hall, 1977 Nucleotide sequence of a mutant eukaryotic  
502        gene: the yeast tyrosine-inserting ochre suppressor *SUP4-o*. *Proc. Natl. Acad. Sci. USA*. 74:  
503        5453–5457.
- 504    Gorini L., and J. R. Beckwith, 1966 Suppression. *Annu. Rev. Microbiol.* 20: 401–422.
- 505    Goto Y. I., I. Nonaka, and S. Horai, 1990 A mutation in the tRNA<sup>Leu(UUR)</sup> gene associated with  
506        the MELAS subgroup of mitochondrial encephalomyopathies. *Nature* 348: 651–653.
- 507    Himeno H., S. Yoshida, A. Soma, and K. Nishikawa, 1997 Only one nucleotide insertion to the  
508        long variable arm confers an efficient serine acceptor activity upon *Saccharomyces*  
509        *cerevisiae* tRNA<sup>Leu</sup> in vitro. *J. Mol. Biol.* 268: 704–711.
- 510    Hoffman K. S., M. D. Berg, B. H. Shilton, C. J. Brandl, and P. O’Donoghue, 2017 Genetic  
511        selection for mistranslation rescues a defective co-chaperone in yeast. *Nucleic Acids Res.*  
512        45: 3407–3421.
- 513    Hou Y. M., and P. Schimmel, 1988 A simple structural feature is a major determinant of the  
514        identity of a transfer RNA. *Nature* 333: 140–145.
- 515    Isaacson J., 2018 Creating tools to determine whether *Katanin 60* affects female rejection of  
516        males in *Drosophila*. *Electron. Thesis Diss. Repos.* 5588: <https://ir.lib.uwo.ca/etd/5588>.

- 517 Ishimura R., G. Nagy, I. Dotu, H. Zhou, X. L. Yang, *et al.*, 2014 Ribosome stalling induced by  
518 mutation of a CNS-specific tRNA causes neurodegeneration. *Science*. 345: 455–459.
- 519 Joshi K., L. Cao, and P. J. Farabaugh, 2019 The problem of genetic code misreading during  
520 protein synthesis. *Yeast* 36: 35–42.
- 521 Käll L., J. D. Canterbury, J. Weston, W. S. Noble, and M. J. MacCoss, 2007 Semi-supervised  
522 learning for peptide identification from shotgun proteomics datasets. *Nat. Methods* 4: 923–  
523 925.
- 524 Kapur M., and S. L. Ackerman, 2018 mRNA translation gone awry: translation fidelity and  
525 neurological disease. *Trends Genet.* 34: 218–231.
- 526 Lant J. T., M. D. Berg, I. U. Heinemann, C. J. Brandl, and P. O’Donoghue, 2019 Pathways to  
527 disease from natural variations in human cytoplasmic tRNAs. *J. Biol. Chem.* 294: 5294–  
528 5308.
- 529 Laski F. A., S. Ganguly, P. A. Sharp, U. L. RajBhandary, and G. M. Rubin, 1989 Construction,  
530 stable transformation, and function of an amber suppressor tRNA gene in *Drosophila*  
531 *melanogaster*. *Proc. Natl. Acad. Sci. USA.* 86: 6696–6698.
- 532 Leutert M., R. A. Rodríguez-Mias, N. K. Fukuda, and J. Villén, 2019 R2-P2 rapid-robotic  
533 phosphoproteomics enables multidimensional cell signaling studies. *Mol. Syst. Biol.* 15:  
534 e9021.
- 535 Liu Y., J. S. Satz, M. N. Vo, L. A. Nangle, P. Schimmel, *et al.*, 2014 Deficiencies in tRNA  
536 synthetase editing activity cause cardioproteinopathy. *Proc. Natl. Acad. Sci. USA.* 111:  
537 17570–17575.

- 538 Lu J., M. Bergert, A. Walther, and B. Suter, 2014 Double-sieving-defective aminoacyl-tRNA  
539 synthetase causes protein mistranslation and affects cellular physiology and development.  
540 Nat. Commun. 5: 1–13.
- 541 Marygold S. J., J. Roote, G. Reuter, A. Lambertsson, M. Ashburner, *et al.*, 2007 The ribosomal  
542 protein genes and *Minute* loci of *Drosophila melanogaster*. Genome Biol. 8.
- 543 McClain W. H., and K. Foss, 1988 Changing the identity of a tRNA by introducing a G-U  
544 wobble pair near the 3' acceptor end. Science. 240: 793–796.
- 545 Meziane A. El, S. K. Lehtinen, N. Hance, L. G. J. Nijtmans, D. Dunbar, *et al.*, 1998 A tRNA  
546 suppressor mutation in human mitochondria. Nat. Genet. 18: 350–353.
- 547 Mitchell H. K., L. S. Lipps, and U. M. Tracy, 1977 Transcriptional changes in pupal hypoderm  
548 in *Drosophila melanogaster*. Biochem. Genet. 15: 575–587.
- 549 Mitchell H. K., and N. S. Petersen, 1981 Rapid changes in gene expression in differentiating  
550 tissues of *Drosophila*. Dev. Biol. 85: 233–242.
- 551 Murakami S., K. Kuehnle, and D. B. Stern, 2005 A spontaneous tRNA suppressor of a mutation  
552 in the *Chlamydomonas reinhardtii* nuclear *MCD1* gene required for stability of the  
553 chloroplast *petD* mRNA. Nucleic Acids Res. 33: 3372–3380.
- 554 Nakagawa S., M. Lagisz, K. L. Hector, and H. G. Spencer, 2012 Comparative and meta-analytic  
555 insights into life extension via dietary restriction. Aging Cell 11: 401–409.
- 556 Nangle L. A., C. M. Motta, and P. Schimmel, 2006 Global effects of mistranslation from an  
557 editing defect in mammalian cells. Chem. Biol. 13: 1091–1100.
- 558 Netzer N., J. M. Goodenbour, A. David, K. A. Dittmar, R. B. Jones, *et al.*, 2009 Innate immune

559 and chemically triggered oxidative stress modifies translational fidelity. *Nature* 462: 522–  
560 526.

561 Normanly J., T. Ollick, and J. Abelson, 1992 Eight base changes are sufficient to convert a  
562 leucine-inserting tRNA into a serine-inserting tRNA. *Proc. Natl. Acad. Sci. USA*. 89: 5680–  
563 5684.

564 Paredes J. A., L. Carreto, J. Simões, A. R. Bezerra, A. C. Gomes, *et al.*, 2012 Low level genome  
565 mistranslations deregulate the transcriptome and translome and generate proteotoxic stress  
566 in yeast. *BMC Biol.* 10: 55.

567 Pina C., and F. Pignoni, 2012 Tubby-RFP balancers for developmental analysis: *FM7c 2xTb-*  
568 *RFP*, *CyO 2xTb-RFP*, and *TM3 2xTb-RFP*. *Genesis* 50: 119–123.

569 Port F., H. M. Chen, T. Lee, and S. L. Bullock, 2014 Optimized CRISPR/Cas tools for efficient  
570 germline and somatic genome engineering in *Drosophila*. *Proc. Natl. Acad. Sci. USA*. 111:  
571 E2967–E2976.

572 Regan J. C., M. Khericha, A. J. Dobson, E. Bolukbasi, N. Rattanavirotkul, *et al.*, 2016 Sex  
573 difference in pathology of the ageing gut mediates the greater response of female lifespan to  
574 dietary restriction. *eLife* 5: e10956.

575 Reverendo M., A. R. Soares, P. M. Pereira, L. Carreto, V. Ferreira, *et al.*, 2014 tRNA mutations  
576 that affect decoding fidelity deregulate development and the proteostasis network in  
577 zebrafish. *RNA Biol.* 11: 1199–1213.

578 Ruan B., S. Palioura, J. Sabina, L. Marvin-Guy, S. Kochhar, *et al.*, 2008 Quality control despite  
579 mistranslation caused by an ambiguous genetic code. *Proc. Natl. Acad. Sci. USA*. 105:



- 580 16502–16507.
- 581 Rutherford S. L., and S. Lindquist, 1998 Hsp90 as a capacitor for morphological evolution.  
582 Nature 396: 336–342.
- 583 Samhita L., P. K. Raval, and D. Agashe, 2020 Global mistranslation increases cell survival under  
584 stress in *Escherichia coli*. PLoS Genet. 16: e1008654.
- 585 Schoenmakers E., B. Carlson, M. Agostini, C. Moran, O. Rajanayagam, *et al.*, 2016 Mutation in  
586 human selenocysteine transfer RNA selectively disrupts selenoprotein synthesis. J. Clin.  
587 Invest. 126: 992–996.
- 588 Schultz J., 1929 The Minute reaction in the development of *Drosophila melanogaster*. Genetics  
589 14: 366–419.
- 590 Shan G., and S. Gerstenberger, 2017 Fisher’s exact approach for post hoc analysis of a chi-  
591 squared test. PLoS One 12: e0188709.
- 592 Shcherbakov D., Y. Teo, H. Boukari, A. Cortes-Sanchon, M. Mantovani, *et al.*, 2019 Ribosomal  
593 mistranslation leads to silencing of the unfolded protein response and increased  
594 mitochondrial biogenesis. Commun. Biol. 2: 381.
- 595 Shoffner J. M., M. T. Lott, A. M. S. Lezza, P. Seibel, S. W. Ballinger, *et al.*, 1990 Myoclonic  
596 epilepsy and ragged-red fiber disease (MERRF) is associated with a mitochondrial DNA  
597 tRNA<sup>Lys</sup> mutation. Cell 61: 931–937.
- 598 Sikorski R. S., and P. Hieter, 1989 A system of shuttle vectors and yeast host strains designed for  
599 efficient manipulation of DNA in *Saccharomyces cerevisiae*. Genetics 122: 19–27.
- 600 Song L., Y. He, J. Ou, Y. Zhao, R. Li, *et al.*, 2017 Auxilin underlies progressive locomotor

- 601 deficits and dopaminergic neuron loss in a *Drosophila* model of Parkinson's disease. *Cell*  
602 Rep. 18: 1132–1143.
- 603 Sørensen J. G., T. N. Kristensen, K. V. Kristensen, and V. Loeschcke, 2007 Sex specific effects  
604 of heat induced hormesis in Hsf-deficient *Drosophila melanogaster*. *Exp. Gerontol.* 42:  
605 1123–1129.
- 606 Stadler J., and C. Yanofsky, 1959 Studies on a series of tryptophan-independent strains derived  
607 from a tryptophan-requiring mutant of *Escherichia coli*. *Genetics* 44: 105–123.
- 608 Tower J., 2011 Heat shock proteins and *Drosophila* aging. *Exp. Gerontol.* 46: 355–362.
- 609 Viña J., and A. Lloret, 2010 Why women have more Alzheimer's disease than men: Gender and  
610 mitochondrial toxicity of amyloid- $\beta$  peptide. *J. Alzheimer's Dis.* 20.
- 611 Warrick J. M., H. Y. E. Chan, G. L. Gray-Board, Y. Chai, H. L. Paulson, *et al.*, 1999  
612 Suppression of polyglutamine-mediated neurodegeneration in *Drosophila* by the molecular  
613 chaperone HSP70. *Nat. Genet.* 23: 425–428.
- 614 Wills N., R. F. Gesteland, J. Karn, L. Barnett, S. Bolten, *et al.*, 1983 The genes *sup-7 X* and *sup-*  
615 *5 III* of *C. elegans* suppress amber nonsense mutations via altered transfer RNA. *Cell* 33:  
616 575–583.
- 617 Wiltrout E., J. M. Goodenbour, M. Fréchin, and T. Pan, 2012 Misacylation of tRNA with  
618 methionine in *Saccharomyces cerevisiae*. *Nucleic Acids Res.* 40: 10494–10506.
- 619 Zheng J., Y. Ji, and M. X. Guan, 2012 Mitochondrial tRNA mutations associated with deafness.  
620 *Mitochondrion* 12: 406–413.
- 621 Ziehm M., M. D. Piper, and J. M. Thornton, 2013 Analysing variation in *Drosophila* aging

622 across independent experimental studies: a meta-analysis of survival data. *Aging Cell* 12:  
623 917–922.

624 Zielonka D., J. Marinus, R. A. C. Roos, G. De Michele, S. Di Donato, *et al.*, 2013 The influence  
625 of gender on phenotype and disease progression in patients with Huntington’s disease. *Park.*  
626 *Relat. Disord.* 19: 192–197.

627 Zimmerman S. M., Y. Kon, A. C. Hauke, B. Y. Ruiz, S. Fields, *et al.*, 2018 Conditional  
628 accumulation of toxic tRNAs to cause amino acid misincorporation. *Nucleic Acids Res.* 46:  
629 7831–7843.
